# Supplementary material for: Formation of double helical microfibrils from small molecules
Source: Royal Society of Chemistry journal article supplement (doi:10.1039/c4tc01083c), 2014-08-27
Supplement: c4tc01083c1.pdf [file c4tc01083c1.pdf]

## Supporting Information for

### Formation of double helical microfibrils from small molecules

Xianbin Jia<sup>‡ac</sup>, Shiyun Lou<sup>‡a</sup>, Honglei Yuan<sup>‡b</sup>, Shasha Tian<sup>a</sup>, Chunyu Niu<sup>a</sup>, Ruijian Yuan<sup>d</sup>, Xinjuan Li<sup>c</sup>,  
Shaomin Zhou<sup>\*a</sup>

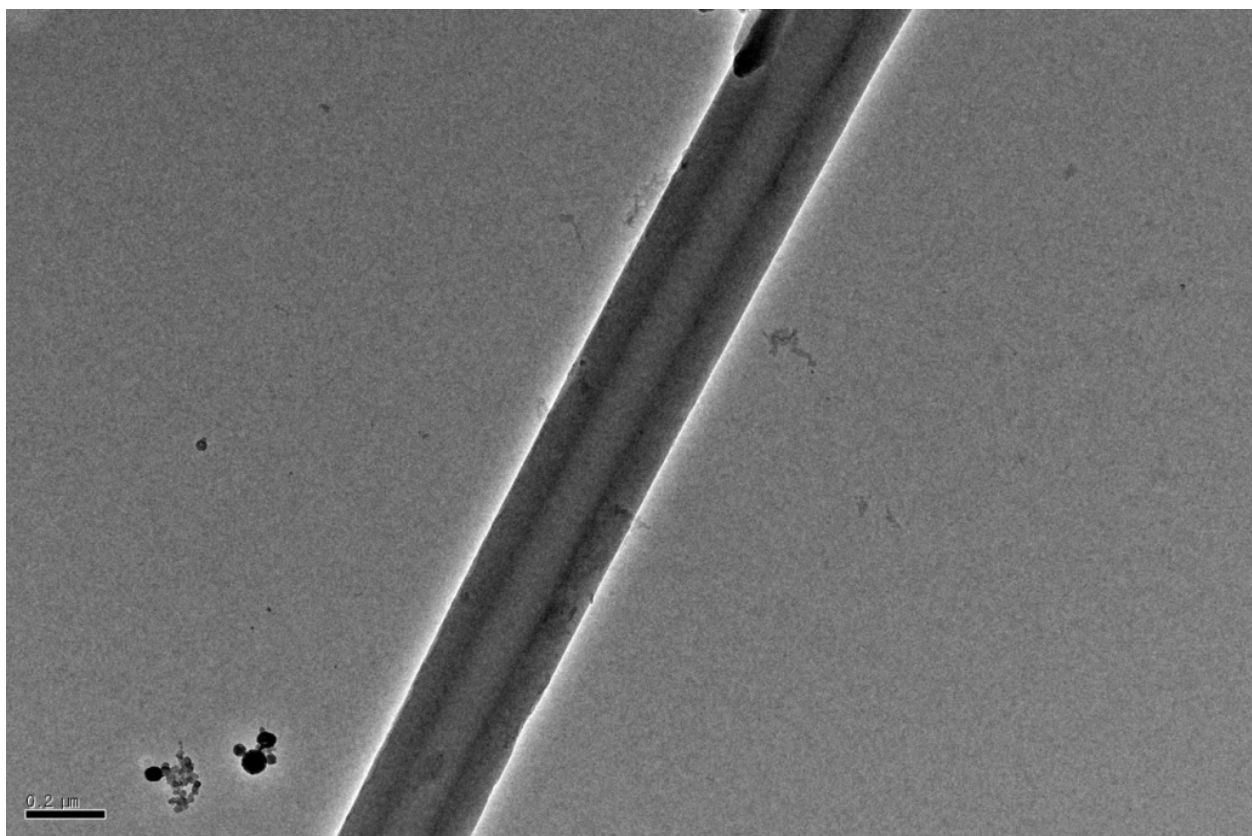

**Figure S1.** representative overview TEM image of the as-synthesized PTCDA microtube by deposited on the silicon substrate.

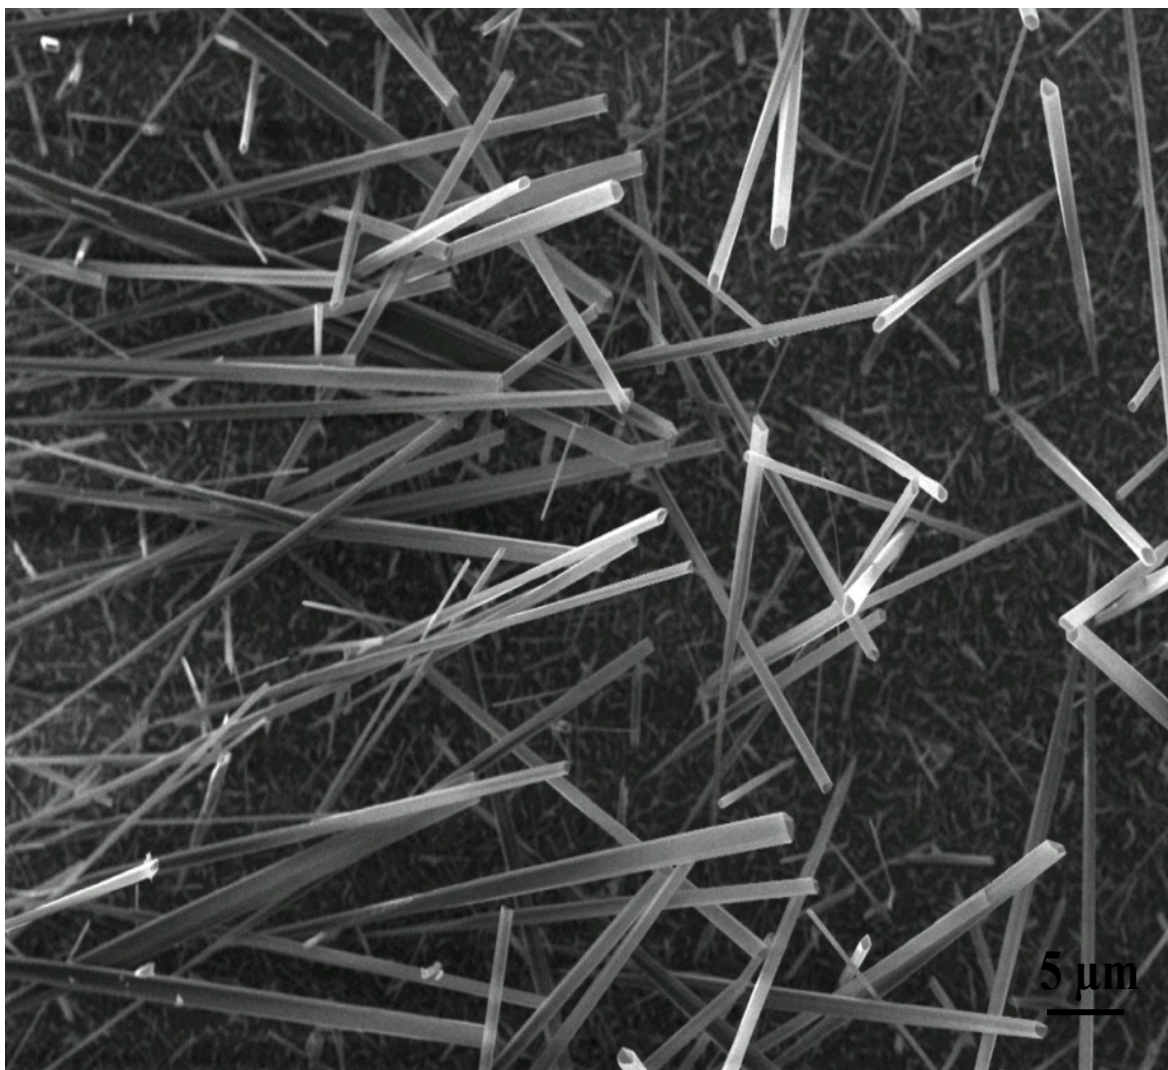

**Figure 2.** SEM image of PTCDA microtubes deposited on silicon substrate at evaporation temperature of 550°C and at substrate temperatures of 360°C.

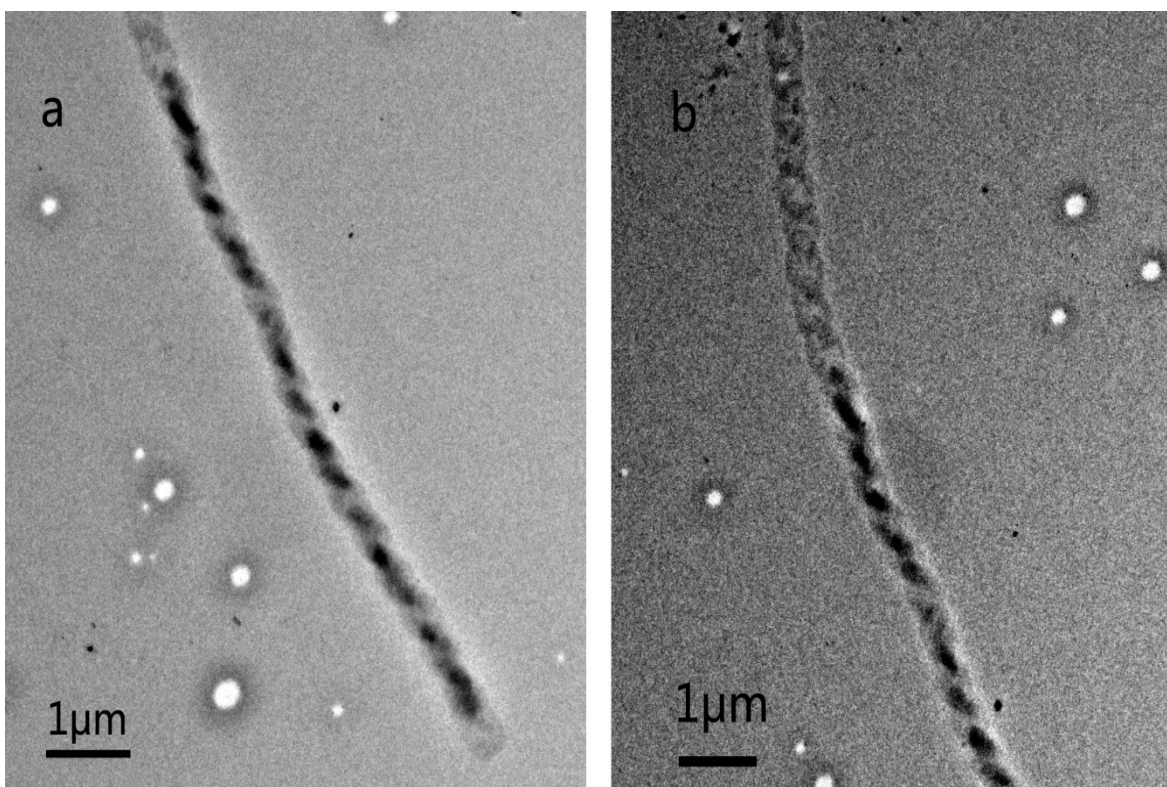

**Figure S3. representative overview TEM image of the as-synthesized PTCDA double helical microfibrils by deposited on the silicon substrate (a) before adsorption and (b) after adsorption.**

Figure s3 is the TEM images of the fibrils and tubes before (Figure s a) and after (Figure s b) adsorption of ethanol are shown in the following two figures. From the imagines, we could perceive there was not effect on the morphology mainly due to the pure physical change instead of chemical reaction (inertness of ethanol), indicating good reproducibility and stability.
